1 **mTORC1 Restricts Hepatitis C Virus Replication Through ULK1-mediated**  
2 **Suppression of miR-122 and Facilitates Post-replication Events**

3

4 Manish Kumar Johri<sup>1,2</sup>, Hiren Vasantrai Lashkari<sup>1</sup>, Dhiviya Vedagiri<sup>1</sup>, Divya Gupta<sup>1</sup>, and  
5 Krishnan Harinivas Harshan<sup>1,2</sup>#

6

7 <sup>1</sup>CSIR-Centre for Cellular and Molecular Biology, Uppal Road, Hyderabad-500007,  
8 India

9 <sup>2</sup>Academy of Scientific and Innovative Research (AcSIR), Ghaziabad- 201002, India  
10

11

12

13 #Address correspondence to: Krishnan Harinivas Harshan, [hkrishnan@ccmb.res.in](mailto:hkrishnan@ccmb.res.in)

14

15

16

17

18

19

20 **ABSTRACT**

21 Mechanistic target of rapamycin (mTOR) is an important kinase that assimilates several  
22 upstream signals including viral infection and facilitates appropriate response by the cell  
23 through two unique complexes mTORC1 and mTORC2. Here, we demonstrate that  
24 mTORC1 is activated early during HCV infection as antiviral response. Pharmacological  
25 inhibition of mTORC1 promoted HCV replication as suggested by elevated levels of  
26 HCV (+) and (-) RNA strands. This was accompanied by significant drop in extracellular  
27 HCV RNA levels indicating defective post-replication stages. The increase in viral RNA  
28 levels failed to augment intracellular infectious virion levels, suggesting that mTORC1  
29 inhibition is detrimental to post-replication steps. Lower infectivity of the supernatant  
30 confirmed this observation. Depletion of Raptor and ULK1 accurately reproduced these  
31 results suggesting that mTORC1 imparted these effects on HCV through mTORC1-  
32 ULK1 arm. Interestingly, ULK1 depletion resulted in increased levels of miR-122, a  
33 critical host factor for HCV replication, thus revealing a new mechanism of regulation by  
34 ULK1. The binary effect of mTORC1 on HCV replication and egress suggests that  
35 mTORC1-ULK1 could be critical in replication: egress balance. Interestingly we discover  
36 that ULK1 depletion did not interfere with autophagy in Huh7.5 cells and hence the  
37 effects on HCV replication and post-replication events are not resultant of involvement  
38 of autophagy. Our studies demonstrate an overall ULK1 mediated anti-HCV function of  
39 mTORC1 and identifies an ULK1-independent autophagy that allows HCV replication in  
40 spite of mTORC1 activation.

41

42 Keywords: Hepatitis C Virus, mTOR, Replication, ULK1, miR-122, Autophagy

43

## 44 INTRODUCTION

45 Hepatitis C Virus (HCV) is the major cause of hepatocellular carcinoma worldwide  
46 (Choo et al., 1989). It is the lone member of *Hepacivirus* genus under *Flaviviridae* family  
47 and is represented by seven genotypes. HCV spreads through blood or organs and  
48 over 170 million people are estimated to have been infected by this pathogen (Hadigan  
49 and Kottlilil, 2011), of which over 71 million people worldwide are chronically infected.  
50 Conventional combination therapy using pegylated IFN- $\alpha$  and Ribavirin is associated  
51 with inconsistent results and causes severe side effects (Fried, 2002; Manns et al.,  
52 2006). In the absence of effective vaccines, recently approved direct acting antivirals  
53 (DAAs) have shown remarkable success in virus clearance. However, recent studies  
54 indicate the emergence of resistant clones against DAAs (Chiara Di Maio et al., 2017;  
55 Takeda et al., 2017). Therefore, there is the need for continued efforts for evolving  
56 therapeutic regimens to counter the HCV menace.

57 Of the several host factors critical for HCV sustenance, miR-122, a liver enriched  
58 miRNA, is indispensable for HCV replication (Jopling et al., 2005). miR-122 is a unique  
59 case of miRNA mediated positive regulation, where it binds to the 5' UTR of HCV and  
60 stabilizes it (Shimakami et al., 2012). More recent studies suggest that miR-122 does  
61 more than providing stability, but is involved in HCV RNA synthesis (Li et al., 2013).  
62 Other studies also indicate that miR-122 regulates HCV replication: translation balance  
63 (Masaki et al., 2015). It has been demonstrated that simple expression of miR-122

64 renders otherwise non-permissive hepatic cell lines HCV permissive (Kambara et al.,  
65 2012).

66 Mechanistic target of Rapamycin (mTOR), a major serine/threonine kinase found in  
67 eukaryotes is the target of the versatile drug Rapamycin (Brown et al., 1994; Sabatini et  
68 al., 1994). mTOR functions as the catalytic subunit of at least two distinct complexes,  
69 mTORC1 and mTORC2 (Saxton and Sabatini, 2017) . mTORC1 is constituted by  
70 Raptor, mLST8, PRAS40 and DEPTOR in addition to mTOR (Kim et al., 2002;  
71 Wullschleger et al., 2006). mTORC1 is a major signaling hub that regulates several  
72 cellular and metabolic activities such as protein translation, autophagy, lipid and nucleic  
73 acid biosynthesis. Deregulated mTORC1 signaling is implicated in several cancers  
74 (Hsieh et al., 2010; Laplante and Sabatini, 2012). mTORC1 kinase regulates cell  
75 functioning by phosphorylating its diverse set of substrates. Of these, eukaryotic  
76 translation initiation factor E (eIF4E)-binding protein (4EBP1) is a major substrate that  
77 regulates translation initiation (Haghighat et al., 1995). 4EBP1, in its  
78 hypophosphorylated form sequesters eukaryotic cap binding protein eIF4E thereby  
79 inhibiting cap dependent translation (Richter and Sonenberg, 2005). However, upon  
80 phosphorylation by mTORC1, hyperphosphorylated 4EBP1 loses its affinity for eIF4E  
81 thereby facilitating translation initiation. Another well-known substrate of mTORC1 is  
82 Unc-51 like autophagy activating kinase 1(ULK1) that activates autophagy.  
83 Phosphorylation of ULK1 by mTORC1 at S758 residue inhibits autophagy (Egan et al.,  
84 2011). Therefore, active mTORC1 can activate translation initiation and suppress  
85 autophagy. However, autophagy is a critical requirement for HCV replication (Dreux et

86 al., 2009; Tanida et al., 2009). Activation of mTORC1 could thus be considered as a  
87 potential target for HCV replication by limiting autophagy.

88 Whereas a wealth of information exists on mTORC1, reports on the regulation by  
89 mTORC2 are far fewer. mTORC2 is constituted by its catalytic subunit mTOR, the  
90 Rapamycin-insensitive protein of mTOR (Rictor), mLST8, DEPTOR and mammalian  
91 stress-activated MAP kinase-interacting protein 1 (SIN1) (Laplante and Sabatini, 2012).  
92 mTORC2 is a tyrosine kinase complex (Sarbasov et al., 2005) that controls cell  
93 survival and cellular proliferation by phosphorylating several members of the AGC  
94 (PKA/PKG/PKC) family of protein kinases (Saxton and Sabatini, 2017). Rapamycin is  
95 known to inhibit mTORC1 exclusively during short-term treatment but can inhibit both  
96 complexes C1 and C2 during long-term treatment (Sarbasov et al., 2006). Rapamycin  
97 has differential effects on mTORC1 substrates and several cancer lines demonstrate  
98 resistance to the drug (Choo et al., 2008). Other important active site inhibitors such as  
99 Torin1 (Thoreen et al., 2009) and PP242 (Feldman et al., 2009) inhibit both complexes.  
100 The latter drugs potently inhibit protein translation even in Rapamycin resistant systems.  
101 mTOR, being a crucial molecule for both translation and autophagy, should be relevant  
102 in HCV infection. HCV translation is cap-independent and mediated through internal  
103 ribosome entry site (IRES) located in the 5' UTR of its genome (Tsukiyama-Kohara et  
104 al., 1992; Wang et al., 1994). Since cap-independent translation is not directly regulated  
105 by mTORC1, changes in mTOR could affect host translation, sparing that of HCV. On  
106 the other hand, autophagy is critical for HCV replication and establishment of infection.  
107 Regardless of its importance, the role of mTOR in HCV infection has been controversial  
108 with certain reports suggesting its essentiality in HCV replication (Stohr et al., 2016)

109 while others suggest its antiviral role (Mannova and Beretta, 2005; Shao et al., 2010;  
110 Shrivastava et al., 2012). Several factors including cell types, HCV genotype, MOI,  
111 experimental set-up (infection vs. transfection) and duration of infection could have  
112 contributed to these divergent conclusions. Our previous studies have demonstrated  
113 that HCV protein NS5A activated mTORC1 (George et al., 2012). Notwithstanding the  
114 differences, it is evident that mTOR is regulated during HCV infection.

115 Previously, we had demonstrated that HCV NS5A activated mTOR and cap complex  
116 assembly (George et al., 2012) suggesting that mTOR is activated during HCV  
117 infection. In the present study, we sought to understand the role of mTOR in HCV life  
118 cycle and identified that activation of mTORC1 by HCV early during infection is an  
119 antiviral response by the cells. We identify that mTORC1 restricts HCV replication  
120 through ULK1 that further executes the regulation through modulating the levels of miR-  
121 122. mTOR inhibition reduced viral titer in the supernatant through slower assembly and  
122 packaging of the virions. Our studies demonstrate that mTORC1 is key to the balance  
123 between viral replication, virion packaging and release. We also identify a disjunction  
124 between ULK1 and autophagy in Huh 7.5 cells thereby explaining simultaneous  
125 activation of mTORC1 and autophagy in HCV infected cells. Our results indicate a  
126 possible molecular explanation of Huh7.5 being the most efficient system for HCV  
127 replication.

## 128 **Results**

### 129 ***HCV infection activates mTOR***

130 To investigate the regulation of mTOR upon HCV infection, the kinetics of mTOR activity  
131 during HCV infection was studied. Huh7.5 cells infected with 0.5 MOI of HCV gt2a were

132 collected at every 24 hr intervals up to 96 hrs (Figure 1A). HCV infection was confirmed  
133 by immunoblotting of viral core protein. mTOR activity was evaluated by measuring  
134 phosphorylation of its substrate 4EBP1. Figure 1B and 1C demonstrated that HCV  
135 infection caused remarkable mTOR activation at 24 hpi, as compared with the mock,  
136 and moderated later on. Since enhanced mTOR activity was detected early during  
137 infection, a probable role of mTOR on HCV was further explored.

138 ***mTOR restricts intracellular HCV RNA abundance but augments its***  
139 ***extracellular levels***

140 Activation of mTOR in response to HCV infection could possibly be either (i) a host  
141 antiviral response to HCV replication; or (ii) facilitating HCV infection. We sought to  
142 address these possibilities by inhibiting mTOR using two pharmacological inhibitors of  
143 mTOR, Rapamycin and Torin1. While mTOR inhibition restrains host translation, it is  
144 expected to spare IRES mediated cap-independent HCV translation using. Huh7.5 cells  
145 infected with HCV were inhibited with 25nM Rapamycin/750nM Torin1 for 24 hrs starting  
146 at 48 hpi (Figure 2A). Prolonged inhibition was important from a clinical management  
147 aspect. Both Rapamycin and Torin1, the latter more strongly, inhibited mTOR in HCV  
148 infected cells as indicated by dephosphorylations of 4EBP1 and ULK1 (Figure 2B).  
149 Inhibitions in mock-infected cells were also observed (data not shown, as they are  
150 irrelevant to the study). We studied their effect on HCV by quantifying intracellular HCV  
151 (+) and (-) strand abundance. Completion of HCV replication cycle requires generation  
152 of both (+) and (-) strands and hence any consistent change in the levels of both strands  
153 is a true reflection of changes in replication rate. mTORC1 inhibition is well known to  
154 affect protein homeostasis and stability (Zhao et al., 2015). We chose not to use

155 luciferase based replicon assays due to the possibility that mTORC1 inhibitors might  
156 affect the stability and enzyme activity of luciferase.

157 Extensive Torin1 treatment potently induced the levels of HCV (+) and (-) strands  
158 (Figure 2C and 2D) and indicated activation of HCV replication. Rapamycin inhibition  
159 also caused similar changes in HCV replication (Figure S1A and S1B). Extracellular viral  
160 RNA abundance is a measure of HCV particles in the supernatant. Supernatant HCV  
161 RNA levels were substantially dropped by Torin1 treatment suggesting that inhibition of  
162 mTOR compromises HCV post-replication step such as packaging or egress (Figure  
163 2E). Torin1 treatment did not suppress core or NS3 expression suggesting that HCV  
164 replication enhancement did not compromise HCV translation, i.e. not a case of  
165 replication-translation switching. (Figure 2B, 2F and 2G). These results indicate that  
166 mTOR is an important player in balancing intracellular and extracellular HCV RNA  
167 levels.

#### 168 ***Low mTOR activity at the time of infection enhances HCV replication***

169 In previous experiments, the role of mTOR was addressed well beyond the peak HCV  
170 replication stage. Since mTOR activation occurred during early hours of infection, we  
171 sought to learn the effect of mTOR inhibition at the time of infection on HCV. Pre-  
172 inhibition mode is also crucial to understand the effect of mTOR inhibition on HCV entry  
173 and replication in previously uninfected liver cells when mTOR inhibitors are part of anti-  
174 HCV regimen. Huh7.5 cells were pre-inhibited with Torin1 or Rapamycin for 4 hrs and  
175 infected with HCV for 4 hrs in presence of the inhibitors (Figure 3A). Viral supernatants  
176 with inhibitors were replaced with growth medium and the cells were allowed to grow  
177 further for 68 hrs at the end of which viral RNA levels were assayed. From now on, we



178 refer to this as pre-inhibition mode of infection. Inhibitions at the time of infection and  
179 after 4 hrs of infection were confirmed in parallel mock-infected sets (Figure S2A and  
180 S2B respectively). Interestingly, mTOR remained inhibited even after 68hrs of treatment  
181 (Figure 3B), suggesting that mTOR was constantly under suppression throughout the  
182 time duration of infection. Similar to 24 hrs inhibition, pre-inhibition of mTOR by Torin1  
183 substantially increased HCV RNA levels (Figure 3C and 3D) and caused severe  
184 reduction in HCV supernatant RNA (Figure 3E), confirming that prolonged suppression  
185 of mTOR boosts HCV replication and impairs viral packaging/egress. As in the earlier  
186 case, no remarkable drop in core or NS3 expression was observed during pre-inhibition  
187 experiments (Figure 3F and 3G), confirming that HCV translation is unaffected by  
188 mTOR inhibition. Higher levels of core detected in prolonged-inhibition could be  
189 resultant of dynamics of protein stabilization as this was not obvious in pre-inhibition.  
190 Rapamycin treatment caused similar effects on HCV replication, albeit less remarkably  
191 (Figure S3A and S3B).

### 192 **mTOR inhibition suppresses HCV assembly and viral release**

193 To address whether mTOR inhibition affects the viral post-replication steps leading to  
194 loss in infectivity, intracellular viral particles extracted from equal number of pre-treated,  
195 HCV infected cells used in experiments shown in Figure 3 and their infectivity was  
196 tested on naïve Huh7.5 cells. Infectivity between the samples was measured by  
197 comparing the HCV RNA levels in the infected cells and their differences were  
198 represented as relative infectivity. Notwithstanding the higher RNA presence, infectivity  
199 of cellular virions extracted from Torin1 treated cells did not vary from that from DMSO  
200 treated samples (Figure 4A). The results suggest that despite augmenting intracellular

201 RNA abundance, Torin1 treatment did not alter the infectious viral particle number.  
202 Thus, mTOR inhibition promotes HCV replication but not viral assembly. Next, we  
203 tested the infectivity of equal volumes viral supernatants from Torin1 treated cells by  
204 infecting naïve cells. This was again measured by relative HCV RNA levels in the  
205 infected cells. Interestingly, infectivity of HCV supernatant from Torin1 treated cells was  
206 substantially lower as compared with DMSO treated samples (Figure 4B). The drop in  
207 infectivity was well comparable with that of HCV RNA levels in supernatants following  
208 Torin1 treatment (Figure 3E). Comparable results were observed in prolonged treatment  
209 as well (Figure S4A and S4B). This result suggests that the virions released in Torin1  
210 treated cells are indeed infectious, but their release into the supernatant is defective.  
211 This presented a conundrum because our earlier results suggested that viral assembly  
212 seemed unaffected (Figure 4A). However, the drop in supernatant viral particles is a  
213 clear indicator of reduced assembly or release. Any inhibition of release, but not  
214 assembly, would have resulted in intracellular accumulation of infectious virions leading  
215 to increased infectivity by intracellular virions that was not the case (Figure 4A). HCV  
216 assembly, packaging and release are integrally associated and our results suggest that  
217 mTOR inhibition activated HCV replication and suppressed later events of packaging  
218 and release. Further focused studies are required to delineate these processes.  
219 mTORC1 is not known to regulate cap-independent translation. In prolonged treatment  
220 cases, Torin1 induced core levels while no change was observed in pre-treatment  
221 (Figures 2B, 2F, 3B and 3F). Levels of another viral protein, NS3, were unchanged in  
222 both conditions (Figures 2B, 2G, 3B and 3G). These findings suggested that mTORC1  
223 inhibition did not suppress HCV translation. This was verified by measuring HCV RNA

224 loading in polysome during Torin1 treatment. In contrast to the reduction in polysome  
225 size (Figure 4C and 4D), HCV RNA association with the polysomes was enhanced  
226 (Figure 4E) by Torin1 pre-treatment, confirming the previous reports that mTOR  
227 inhibition does not inhibit IRES translation. Therefore, the drop in HCV RNA and  
228 infectivity in the supernatant upon Torin1 treatment is not due to perturbation of HCV  
229 translation, but possibly due to assembly and packaging.

### 230 ***mTORC1, but not mTORC2, restricts intracellular HCV RNA abundance***

231 Torin1 inhibits both mTORC1 and mTORC2. Rapamycin inhibits only mTORC1 during  
232 short treatment but can inhibit both mTORC1 and mTORC2 upon extensive treatment.  
233 The effect of mTOR inhibition on HCV could have been mediated through either of the  
234 mTOR complexes. In order to identify the mTOR complex involved in HCV regulation,  
235 we depleted Raptor, a major regulatory component of mTORC1, in Huh7.5 cells by  
236 siRNA prior to HCV infection (Figure 5A). Raptor depletion resulted in lower 4EBP1 and  
237 ULK1 phosphorylations as expected (Figure 5A). Similar to long-term inhibition with  
238 Torin1 and Rapamycin, Raptor depletion induced intracellular HCV RNA levels (Figure  
239 5B) and suppressed HCV RNA abundance in the supernatant (Figure 5C). On the  
240 contrary, depletion of Rictor, an integral mTORC2 component, had no effect on HCV  
241 replication (Figure S5A and S5B). These results confirm that mTOR restricts HCV  
242 replication and promotes viral release through mTORC1 but not mTORC2.

### 243 ***mTORC1 restricts intracellular HCV RNA levels through ULK1***

244 4EBP1 and ULK1 are key substrates of mTORC1. We sought to identify the mTORC1  
245 substrate through which mTORC1 regulated HCV replication. Depletion of 4EBP1  
246 (Figure S6A and S6B), did not alter HCV replication in Huh7.5 cells, suggesting its

247 dispensability in HCV replication. Next, we analyzed HCV replication in ULK1 depleted  
248 Huh7.5 cells. Interestingly, robust ULK1 depletion (Figure 5D) caused significant  
249 increase of intracellular (Figure 5E) and severe drop of supernatant HCV RNA levels  
250 (Figure 5F), consistent with mTOR inhibition and Raptor depletion. Taken together,  
251 these results demonstrate that mTORC1 restricts HCV replication through a mechanism  
252 that involves ULK1, but not 4EBP1.

### 253 ***mTORC1 regulates miR-122 levels through ULK1***

254 Since miR-122 is indispensable for HCV replication, we next enquired its status during  
255 mTORC1 inhibitions and knock-downs. Torin1, in both pre-treatment and prolonged  
256 treatment resulted in considerable increase in miR-122 levels in HCV infected cells  
257 (Figures 6A and S7A respectively) and during ULK1 and Raptor depletions (Figure 6B  
258 and S7B respectively). Introduction of anti-miR-122, but not the control anti-miR,  
259 efficiently removed miR-122 (Figures 6C and 6D) and caused substantial drop in HCV  
260 (+) and (-) strand RNA suggesting that the over-expressed miR-122 was functional  
261 (Figures 6E and 6F). HCV translation was suppressed under these conditions as well  
262 (Figure 6C). These observations suggest that mTORC1 regulates miR-122 levels  
263 through ULK1. These data also suggest that ULK1 has an unidentified role of regulating  
264 miR-122 levels through which HCV replication is regulated. These results propose that  
265 mTORC1, through ULK1, inhibits miR-122 levels. To the best of our knowledge, this  
266 mechanism of regulation of HCV replication is hitherto unidentified.

### 267 ***Uncoupling of ULK1 with autophagy facilitates maintenance of autophagy even*** 268 ***under mTOR activation***

269 Our results have presented a conundrum since mTORC1 activation would normally  
270 suppress autophagy thereby causing a probable inhibition of HCV replication. To  
271 address this important point, the status of autophagy was analyzed in Torin1 pre-treated  
272 samples described in Figure 3A. Pre-treatment with Torin1 of HCV infected cells  
273 induced autophagy, evident from the depleted p62 levels (Figure 7A), thus validating the  
274 anti-autophagic role of mTOR. Thus, autophagy activation by Torin1 could be a possible  
275 contributor to the enhanced HCV replication. However, this analysis was performed at  
276 the end of 72 hours of infection and hence is not a reflection of the status of autophagy  
277 at the time, and during the early hours of infection that is critical for establishment of  
278 HCV infection. To ascertain this, we treated Huh7.5 cells with Torin1 for 8 hrs, as  
279 described in Figure S2B, at the end of which cells were analyzed for autophagy. Not  
280 surprisingly, activation of autophagy was also evident at the end of 8 hrs of Torin1  
281 treatment without HCV infection (Figure 7B), indicating that this activation could possibly  
282 have contributed to the elevated intracellular HCV strands. Similar induction of  
283 autophagy was found in prolonged inhibition (Figure 7C). Next, autophagy markers were  
284 evaluated in ULK1 depleted cells upon HCV infection. Surprisingly, ULK1 depletion  
285 caused no appreciable change in the levels of p62 and Beclin and in LC3 lipidation  
286 (Figure 7D-F). To assess the contribution of autophagy in the Torin1 mediated activation  
287 of HCV replication, we pre-treated cells with Chloroquine for 6 hrs in presence or  
288 absence of Torin1. Treatment was followed by HCV infection for 4 hrs in presence of the  
289 inhibitors as indicated above. Chloroquine mediated autophagy inhibition, confirmed by  
290 the accumulation of p62 and lipidation of LC3A/B (Figure 7G), caused severe inhibition  
291 of HCV replication (Figure 7H). Similar pre-treatment with Bafilomycin also caused

292 substantial drop in HCV RNA abundance (Figure S8), confirming that inhibition of  
293 autophagy overrides activation of HCV replication by Torin1. However, since ULK1  
294 depletion enhanced HCV replication in the absence of autophagy induction, we propose  
295 that autophagy induction during mTORC1 inhibition could be through ULK1 independent  
296 mechanisms. We speculate that mTOR mediated restriction on HCV would have been  
297 more effective if autophagy was under regulation by ULK1 in this system. Our results  
298 demonstrate that mTORC1 restricts HCV replication through ULK1 mediated  
299 mechanism without restricting autophagy and this uncoupling allows HCV to flourish in  
300 Huh7.5 cells.

## 301 **DISCUSSION**

302 The current work identifies two critical functions of mTOR on HCV life cycle. On one  
303 hand, it restricts HCV replication and on the other, it facilitates steps involved in the  
304 assembly of the virions and their release. The dual effects of mTORC1 on HCV are  
305 clearly interpreted from the inhibitor and knockdown studies. mTORC1 activation early  
306 during HCV infection could have been interpreted either as a pro-viral, pro-growth  
307 response or as an antiviral response. Since mTOR restricts HCV replication that  
308 precedes the packaging, we conclude that mTOR is part of anti-HCV machinery in  
309 hepatoma cells.

310 The increase in (+) strands of HCV following long-term inhibition could be resulted by  
311 increased replication rate, by accumulation of viral genome/packaged virions or by  
312 replication-translation switch. However, the concurrent increase in the (-) strand of HCV  
313 confirmed that mTORC1 inhibition indeed activated its replication. Strand-specific q-RT  
314 PCR is a powerful technique in determining the replication status of (+) stand RNA

315 viruses through abundance of (-) strand RNA (Komurian-Pradel et al., 2004; Plaskon et  
316 al., 2009; Rance et al., 2012).

317 Effect of mTOR on HCV replication is addressed by previous studies. However,  
318 annotating mTOR as a supportive or a suppressive host factor for HCV replication  
319 remained debatable. Present study recommends mTOR as an antiviral host factor that  
320 limits HCV replication. Our results of HCV mediated suppression of HCV replication  
321 corroborate with certain previous report (Mannova and Beretta, 2005) and contradicts  
322 with a few others (Huang et al., 2013; Stohr et al., 2016). Several factors including cell  
323 types, HCV genotype, MOI, experimental set-up (infection vs. transfection) and duration  
324 of infection could have contributed to these divergent conclusions. However, our studies  
325 have looked at the role of mTOR comprehensively and used infectious viral system to  
326 reach our findings.

327 Infectivity assay using the intracellular virions of Torin1 treated samples from the first  
328 step indicates that post replication steps of HCV cycle remain perturbed by mTOR  
329 inhibition. Increase in viral replication due to drop in viral translation (replication-  
330 translation switch) is shown in many RNA viruses including HCV (Ray and Das, 2011).  
331 However, mTOR inhibitions in our study did not depict any drop in HCV core and NS3  
332 levels suggesting that mTOR inhibition does not trigger a replication: translation switch  
333 in favor of replication by suppressing HCV translation. The increase in intracellular HCV  
334 RNA abundance upon mTORC1 inhibition is clearly the outcome of increased  
335 replication.

336 Our studies unearthed previously unknown mechanism of regulation of antiviral  
337 activities of mTORC1 and identified a new member in this pathway, ULK1. Since ULK1

338 depletion caused activation of miR-122 transcription, it could be suggested that ULK1  
339 regulates their transcription. It is possible that ULK1 mediates transcriptional regulation  
340 through other molecules or directly involved with their transcription. Nuclear functions of  
341 ULK1 have been described recently (Joshi et al., 2016).

342 Egress is a larger process that includes packaging of the genome and its transport  
343 through ER-Golgi system before the release takes place. HCV particle assembly is  
344 associated with lipid droplets (**Wendel et al.**) in addition, requires factors that are  
345 necessary for VLDL assembly and apolipoprotein generation (**Gastaminza et al., 2008**;  
346 **Herker et al., 2010**). HCV trafficking is dependent on ER-Golgi trafficking system  
347 (**Mankouri et al., 2016**) and microtubule polymerization (**Lai et al., 2010**). Since  
348 mTORC1 regulates lipid metabolism (**Laplante and Sabatini, 2009**) and trafficking  
349 (**Jiang and Yeung, 2006**), the assembly and trafficking of HCV particles is a likely  
350 target of mTORC1 inhibition. In support, recent reports implicate the roles of ULK1 in  
351 lipid metabolism (**Ro et al., 2013**) and cytoskeletal rearrangements (**Caino et al., 2013**).  
352 At this stage, the mechanistic details on the reduced HCV RNA abundance in the  
353 supernatant of mTOR inhibited cells are unclear.

354 mTOR inhibition caused significant cell death in pre-inhibition and prolonged inhibition  
355 (Figures S9 A-D). Earlier studies have demonstrated an association between cell  
356 division and HCV replication. However, the inhibitory effect of the inhibitors on cell  
357 division does not contribute significantly to HCV stages as ULK1 and Raptor knockdown  
358 caused similar effects on HCV stages without causing any cell division effects (Figures  
359 S9E and S9F).



360 Induction of mTORC1 is antagonistic to autophagy. ULK1 knockdown has been known  
361 to block autophagy in HEK293 and MEFs (Chan et al., 2007)Huh7.5 cells is the only  
362 known robust infection system for HCV. A single point mutation in the dsRNA sensor  
363 retinoic acid-inducible gene-I (RIG-I) proposed to play a role in higher permissiveness  
364 for HCV RNA replication (Sumpter et al., 2005). However, we propose that uncoupling  
365 of mTORC1 with autophagy facilitated active replication of HCV in Huh7.5 cells. ULK1  
366 depletion unquestionably had no effect on autophagy markers in Huh7.5 cells. We  
367 hypothesize that though mTORC1 phosphorylates ULK1 during the initial hours of  
368 infection, it spares autophagy due to the uncoupling of ULK1 with autophagy. We  
369 propose that this could be a major factor that allows high permissivity for HCV in Huh7.5  
370 cells. In systems where ULK1 still regulates autophagy, activation of mTOR might  
371 effectively suppress autophagy thereby preventing HCV replication. In agreement,  
372 Shrivastava et al. identified concurrent activation of autophagy and mTOR (Shrivastava  
373 et al., 2012) and concluded that HCV induces autophagy while activation of mTOR  
374 facilitated hepatocyte proliferation. Since autophagy seems independent of ULK1 in  
375 Huh7.5, HCV is able to maintain its replication even in the presence of activated  
376 mTORC1.

377 **Conclusion:** Our studies demonstrate that mTOR is activated during the initial stages  
378 of HCV infection. mTOR suppression enhanced HCV RNA titer generated by  
379 augmenting replication and hence mTOR activation can be considered as an antiviral  
380 response. Simultaneously, mTOR inhibition lowered extracellular HCV levels through  
381 suppressing viral package or egress, a feature through which mTOR assumes a virus  
382 friendly molecule . mTOR executed these effects through ULK1 and regulated HCV

383 replication through modulating the levels of miR-122. Interestingly, ULK1, though a key  
384 molecule in autophagy initiation, does not regulate autophagy in Huh7.5 cells and hence  
385 the anti-HCV effects of mTOR could not impart its restriction on HCV replication through  
386 inhibiting autophagy. Thus, this uncoupling allows HCV to replicate by utilizing  
387 autophagy even in the background of active mTOR.

## 388 **Experimental procedures**

### 389 ***Antibodies and inhibitors***

390 All antibodies except p62 and  $\beta$ -Tubulin (Thermo Fischer Scientific) and HCV core  
391 (Abcam), were purchased from Cell Signaling Technology. Torin1 was bought from  
392 Tocris Bioscience and Rapamycin was from Merck Millipore. Chloroquine and  
393 Bafilomycin were from Sigma Aldrich. siRNA pools against RAPTR and ULK1 were  
394 from Dharmacon. *4EBP1* and *RICTOR* shRNAs were from Thermo Fisher Scientific.

### 395 ***Generation of HCVcc particles and titration***

396 Human Hepatoma cell line, Huh7.5 was cultured as described (George et al., 2012).  
397 HCV infectious particles were prepared by *in vitro* transcription (IVT) of full-length  
398 genome from pFL-J6/JFH1, followed by transfection into Huh7.5 cells (George et al.,  
399 2012; Lindenbach et al., 2005). Supernatants from transfected cells were collected,  
400 filtered through 0.45  $\mu$ m filter and quantified by qRT-PCR by absolute quantification.  
401 Briefly, RNA was isolated from viral supernatant and reverse transcribed using HCV RT  
402 Rev primer (5'-TGCACGGTCTACGAGACCTC-3'). HCV genome was quantified using  
403 HCV SG1F (5'-TATGCCCGGCCATTTGGGCG-3') and HCV SG1R (5'-  
404 TACGAGACCTCCCGGGGCAC-3') primers and the viral RNA abundance was  
405 estimated as copies/ml.

## 406 **Primary infection and replication assay by qRT-PCR**

407 Huh7.5 cells were infected with 0.5 MOI of HCV for four hours followed by the  
408 replacement of the virus with fresh media until the cells were harvested. HCV (+) and (-)  
409 RNA strands were quantified by qRT-PCR. Briefly, infected cells were harvested and  
410 total RNA was prepared using Nucleospin RNA kit (Macherey-Nagel). Total RNA from  
411 the supernatants was prepared using Trizol (Thermo Fisher Scientific). Total RNA from  
412 infected cells or supernatants were converted into cDNA using HCV strand-specific  
413 primer (5'-TGCACGGTCTACGAGACCTC-3' for +ve and 5'-  
414 ATGAATCACTCCCCTGTGAG-3' for -ve strand). HCV specific regions were amplified  
415 from equal amounts of cDNA using SYBR Premix Ex Taq (Takara Bio Inc.) in  
416 Lightcycler 480 (Roche Molecular Diagnostics). Fold changes between samples were  
417 calculated by using  $\Delta\Delta$  Cp values with endogenous GAPDH control.

## 418 ***HCV infectivity assay***

419 Infectivity of HCV particles from the infected cells or cell supernatants was measured by  
420 infecting naïve Huh7.5 cells with them. First, Huh7.5 cells were infected with HCV with  
421 Torin1 or DMSO treatment for 72 hrs. For measuring the infectivity of intracellular  
422 virions, equal numbers of cells from different treatments were freeze-thawed thrice in  
423 serum-free DMEM. Equal volumes of these virion containing media were used to infect  
424 naïve Huh7.5 cells for 72 hrs. Subsequently, total RNA was prepared from these  
425 infected cells and HCV RNA levels were quantified by qRT-PCR as described earlier.  
426 Relative HCV RNA levels are reflection of infectivity of virions from the sample and were  
427 plotted in graphs. For measuring the infectivity of supernatants generated from the  
428 primary cultures subjected to HCV infection and treatment, equal volumes of the

429 supernatants were used to infect naïve Huh7.5 cells. 72 hrs later, total RNA was  
430 prepared as described in earlier sections and HCV RNA was quantified by qRT-PCR.  
431 Here again, relative HCV RNA levels represented the infectious viral units in the  
432 supernatant and thus graphically represented.

#### 433 ***Real-time quantitative RT-PCR (qRT-PCR)***

434 Total RNA prepared from samples were converted to cDNA using Primescript RT and  
435 random hexamer. qPCR was performed using SYBR Premix Ex Taq and gene specific  
436 primers. *HNF4A* quantification was described elsewhere (Parveen et al., 2017). miRNAs  
437 were prepared using Nucleospin miRNA kit (Macherey-Nagel). miR-122 was quantified  
438 using Taqman Gene Expression Assay kits from Thermo Fisher Scientific and  
439 normalized against *RNU6B*. All the oligos were procured from Bioserve Bio  
440 Technologies. Oligo details are provided in Table S1.

#### 441 ***Immunoblotting***

442 Immunoblotting was performed as described earlier (George et al., 2012). Densitometric  
443 analyses of blots were done by using Image J software. Relative phosphorylations were  
444 calculated from the ratios of any phosphorylated band to its total protein that was  
445 normalized to the corresponding  $\beta$ -Tubulin as loading control (P/T/C).

#### 446 ***Polysome analysis***

447 Polysome profiles of HCV infected cells undergone pre-treatment were prepared as  
448 described elsewhere (George et al., 2012). Polysomal fractions from DMSO and Torin1  
449 pre-treated HCV infected samples were processed further to prepare polysomal RNA.  
450 Briefly, pooled fractions were incubated with 3M sodium acetate and ethanol and RNA  
451 was precipitated. To remove Heparin from the preparation, precipitated RNA was

452 incubated with 2.5M lithium chloride for 2 hrs at  $-30^{\circ}\text{C}$ . RNA was precipitated at  
453 maximum speed and purified using Nucleospin RNA kit (Macherey-Nagel). cDNA  
454 synthesis and qRT-PCR was carried as mentioned above.

#### 455 **Statistical analysis of data**

456 All the experiments were performed a minimum of three independent times (unless  
457 otherwise specified in figure legends) to generate Mean  $\pm$  SEM that are plotted  
458 graphically. For statistical significance, paired end, two-tailed t-test was performed and  
459 represented as *P*-values. \*, \*\* and \*\*\* indicate *P*-values  $<0.05>0.01$ ,  $<0.01>0.001$  and  
460  $<0.001$  respectively.

461

#### 462 **Acknowledgements**

463 Special thanks to Mohan Singh and Hitha G Nair for logistic assistance in the laboratory.  
464 Giridharan Govindarajan extended assistance with preparation of polysome graph  
465 images. This work was supported by the Department of Biotechnology, Govt. of India  
466 (BT/PR3975/MED/29/336/2011). M.J. and D.G. received fellowship from University  
467 Grants Commission and Council of Scientific and Industrial Research, both under  
468 Govt.of India, respectively.

#### 469 **References**

470 Brown, E.J., Albers, M.W., Shin, T.B., Ichikawa, K., Keith, C.T., Lane, W.S., Schreiber, S.L.,  
471 1994. A mammalian protein targeted by G1-arresting rapamycin-receptor complex. *Nature* 369,  
472 756-758.  
473 Caino, M.C., Chae, Y.C., Vaira, V., Ferrero, S., Nosotti, M., Martin, N.M., Weeraratna, A.,  
474 O'Connell, M., Jernigan, D., Fatatis, A., Languino, L.R., Bosari, S., Altieri, D.C., 2013. Metabolic  
475 stress regulates cytoskeletal dynamics and metastasis of cancer cells. *The Journal of clinical*  
476 *investigation* 123, 2907-2920.  
477 Chan, E.Y., Kir, S., Tooze, S.A., 2007. siRNA screening of the kinome identifies ULK1 as a  
478 multidomain modulator of autophagy. *The Journal of biological chemistry* 282, 25464-25474.  
479 Chiara Di Maio, V., Cento, V., Aragri, M., Paolucci, S., Pollicino, T., Coppola, N., Bruzzone, B.,  
480 Ghisetti, V., Zazzi, M., Brunetto, M., Bertoli, A., Barbaliscia, S., Galli, S., Gennari, W., Baldanti,

481 F., Raimondo, G., Federico Perno, C., Ceccherini-Silberstein, F., 2017. Frequent NS5A and  
482 multiclass resistance in almost all HCV genotypes at DAA failures: what are the chances for  
483 second-line regimens? *Journal of hepatology*.

484 Choo, A.Y., Yoon, S.O., Kim, S.G., Roux, P.P., Blenis, J., 2008. Rapamycin differentially inhibits  
485 S6Ks and 4E-BP1 to mediate cell-type-specific repression of mRNA translation. *Proceedings of*  
486 *the National Academy of Sciences of the United States of America* 105, 17414-17419.

487 Choo, Q.L., Kuo, G., Weiner, A.J., Overby, L.R., Bradley, D.W., Houghton, M., 1989. Isolation of  
488 a cDNA clone derived from a blood-borne non-A, non-B viral hepatitis genome. *Science (New*  
489 *York, N.Y.* 244, 359-362.

490 Dreux, M., Gastaminza, P., Wieland, S.F., Chisari, F.V., 2009. The autophagy machinery is  
491 required to initiate hepatitis C virus replication. *Proceedings of the National Academy of*  
492 *Sciences of the United States of America* 106, 14046-14051.

493 Egan, D., Kim, J., Shaw, R.J., Guan, K.L., 2011. The autophagy initiating kinase ULK1 is  
494 regulated via opposing phosphorylation by AMPK and mTOR. *Autophagy* 7, 643-644.

495 Feldman, M.E., Apse, B., Uotila, A., Loewith, R., Knight, Z.A., Ruggero, D., Shokat, K.M., 2009.  
496 Active-site inhibitors of mTOR target rapamycin-resistant outputs of mTORC1 and mTORC2.  
497 *PLoS biology* 7, e1000038.

498 Fried, M.W., 2002. Side effects of therapy of hepatitis C and their management. *Hepatology*  
499 (Baltimore, Md.) 36, S237-244.

500 Gastaminza, P., Cheng, G., Wieland, S., Zhong, J., Liao, W., Chisari, F.V., 2008. Cellular  
501 determinants of hepatitis C virus assembly, maturation, degradation, and secretion. *Journal of*  
502 *virology* 82, 2120-2129.

503 George, A., Panda, S., Kudmulwar, D., Chhatbar, S.P., Nayak, S.C., Krishnan, H.H., 2012.  
504 Hepatitis C virus NS5A binds to the mRNA cap-binding eukaryotic translation initiation 4F  
505 (eIF4F) complex and up-regulates host translation initiation machinery through eIF4E-binding  
506 protein 1 inactivation. *The Journal of biological chemistry* 287, 5042-5058.

507 Hadigan, C., Kottlilil, S., 2011. Hepatitis C virus infection and coinfection with human  
508 immunodeficiency virus: challenges and advancements in management. *Jama* 306, 294-301.

509 Haghighat, A., Mader, S., Pause, A., Sonenberg, N., 1995. Repression of cap-dependent  
510 translation by 4E-binding protein 1: competition with p220 for binding to eukaryotic initiation  
511 factor-4E. *The EMBO journal* 14, 5701-5709.

512 Herker, E., Harris, C., Hernandez, C., Carpentier, A., Kaehlcke, K., Rosenberg, A.R., Farese,  
513 R.V., Jr., Ott, M., 2010. Efficient hepatitis C virus particle formation requires diacylglycerol  
514 acyltransferase-1. *Nature medicine* 16, 1295-1298.

515 Hsieh, A.C., Costa, M., Zollo, O., Davis, C., Feldman, M.E., Testa, J.R., Meyuhas, O., Shokat,  
516 K.M., Ruggero, D., 2010. Genetic dissection of the oncogenic mTOR pathway reveals  
517 druggable addiction to translational control via 4EBP-eIF4E. *Cancer cell* 17, 249-261.

518 Huang, H., Kang, R., Wang, J., Luo, G., Yang, W., Zhao, Z., 2013. Hepatitis C virus inhibits  
519 AKT-tuberous sclerosis complex (TSC), the mechanistic target of rapamycin (mTOR) pathway,  
520 through endoplasmic reticulum stress to induce autophagy. *Autophagy* 9, 175-195.

521 Jiang, X., Yeung, R.S., 2006. Regulation of microtubule-dependent protein transport by the  
522 TSC2/mammalian target of rapamycin pathway. *Cancer research* 66, 5258-5269.

523 Jopling, C.L., Yi, M., Lancaster, A.M., Lemon, S.M., Sarnow, P., 2005. Modulation of hepatitis C  
524 virus RNA abundance by a liver-specific MicroRNA. *Science (New York, N.Y.)* 309, 1577-1581.

525 Joshi, A., Iyengar, R., Joo, J.H., Li-Harms, X.J., Wright, C., Marino, R., Winborn, B.J., Phillips,  
526 A., Temirov, J., Sciarretta, S., Kriwacki, R., Peng, J., Shelat, A., Kundu, M., 2016. Nuclear ULK1  
527 promotes cell death in response to oxidative stress through PARP1. *Cell death and*  
528 *differentiation* 23, 216-230.

529 Kambara, H., Fukuhara, T., Shiokawa, M., Ono, C., Ohara, Y., Kamitani, W., Matsuura, Y.,  
530 2012. Establishment of a novel permissive cell line for the propagation of hepatitis C virus by  
531 expression of microRNA miR122. *Journal of virology* 86, 1382-1393.



532 Kim, D.H., Sarbassov, D.D., Ali, S.M., King, J.E., Latek, R.R., Erdjument-Bromage, H., Tempst,  
533 P., Sabatini, D.M., 2002. mTOR interacts with raptor to form a nutrient-sensitive complex that  
534 signals to the cell growth machinery. *Cell* 110, 163-175.  
535 Komurian-Pradel, F., Perret, M., Deiman, B., Sodoeyer, M., Lotteau, V., Paranhos-Baccala, G.,  
536 Andre, P., 2004. Strand specific quantitative real-time PCR to study replication of hepatitis C  
537 virus genome. *Journal of virological methods* 116, 103-106.  
538 Lai, C.K., Jeng, K.S., Machida, K., Lai, M.M., 2010. Hepatitis C virus egress and release depend  
539 on endosomal trafficking of core protein. *Journal of virology* 84, 11590-11598.  
540 Laplante, M., Sabatini, D.M., 2009. An emerging role of mTOR in lipid biosynthesis. *Current*  
541 *biology : CB* 19, R1046-1052.  
542 Laplante, M., Sabatini, D.M., 2012. mTOR signaling in growth control and disease. *Cell* 149,  
543 274-293.  
544 Li, Y., Masaki, T., Lemon, S.M., 2013. miR-122 and the Hepatitis C RNA genome: more than  
545 just stability. *RNA biology* 10, 919-923.  
546 Lindenbach, B.D., Evans, M.J., Syder, A.J., Wolk, B., Tellinghuisen, T.L., Liu, C.C., Maruyama,  
547 T., Hynes, R.O., Burton, D.R., McKeating, J.A., Rice, C.M., 2005. Complete replication of  
548 hepatitis C virus in cell culture. *Science (New York, N.Y)* 309, 623-626.  
549 Mankouri, J., Walter, C., Stewart, H., Bentham, M., Park, W.S., Heo, W.D., Fukuda, M., Griffin,  
550 S., Harris, M., 2016. Release of Infectious Hepatitis C Virus from Huh7 Cells Occurs via a trans-  
551 Golgi Network-to-Endosome Pathway Independent of Very-Low-Density Lipoprotein Secretion.  
552 *Journal of virology* 90, 7159-7170.  
553 Mannova, P., Beretta, L., 2005. Activation of the N-Ras-PI3K-Akt-mTOR pathway by hepatitis C  
554 virus: control of cell survival and viral replication. *Journal of virology* 79, 8742-8749.  
555 Manns, M.P., Wedemeyer, H., Cornberg, M., 2006. Treating viral hepatitis C: efficacy, side  
556 effects, and complications. *Gut* 55, 1350-1359.  
557 Masaki, T., Arend, K.C., Li, Y., Yamane, D., McGivern, D.R., Kato, T., Wakita, T., Moorman,  
558 N.J., Lemon, S.M., 2015. miR-122 stimulates hepatitis C virus RNA synthesis by altering the  
559 balance of viral RNAs engaged in replication versus translation. *Cell host & microbe* 17, 217-  
560 228.  
561 Parveen, S., Vedagiri, D., Nair, H.G., Parthasarathy, H., Harshan, K.H., 2017. Unconventional  
562 MAPK-GSK-3beta Pathway Behind Atypical Epithelial-Mesenchymal Transition In  
563 Hepatocellular Carcinoma. *Scientific reports* 7, 8842.  
564 Plaskon, N.E., Adelman, Z.N., Myles, K.M., 2009. Accurate strand-specific quantification of viral  
565 RNA. *PLoS one* 4, e7468.  
566 Rance, E., Tanner, J.E., Alfieri, C., 2012. Inhibition of I $\kappa$ B kinase by thalidomide increases  
567 hepatitis C virus RNA replication. *Journal of viral hepatitis* 19, e73-80.  
568 Ray, U., Das, S., 2011. Interplay between NS3 protease and human La protein regulates  
569 translation-replication switch of Hepatitis C virus. *Scientific reports* 1, 1.  
570 Richter, J.D., Sonenberg, N., 2005. Regulation of cap-dependent translation by eIF4E inhibitory  
571 proteins. *Nature* 433, 477-480.  
572 Ro, S.H., Jung, C.H., Hahn, W.S., Xu, X., Kim, Y.M., Yun, Y.S., Park, J.M., Kim, K.H., Seo, M.,  
573 Ha, T.Y., Arriaga, E.A., Bernlohr, D.A., Kim, D.H., 2013. Distinct functions of Ulk1 and Ulk2 in  
574 the regulation of lipid metabolism in adipocytes. *Autophagy* 9, 2103-2114.  
575 Sabatini, D.M., Erdjument-Bromage, H., Lui, M., Tempst, P., Snyder, S.H., 1994. RAFT1: a  
576 mammalian protein that binds to FKBP12 in a rapamycin-dependent fashion and is homologous  
577 to yeast TORs. *Cell* 78, 35-43.  
578 Sarbassov, D.D., Ali, S.M., Sengupta, S., Sheen, J.H., Hsu, P.P., Bagley, A.F., Markhard, A.L.,  
579 Sabatini, D.M., 2006. Prolonged rapamycin treatment inhibits mTORC2 assembly and Akt/PKB.  
580 *Molecular cell* 22, 159-168.  
581 Sarbassov, D.D., Guertin, D.A., Ali, S.M., Sabatini, D.M., 2005. Phosphorylation and regulation  
582 of Akt/PKB by the rictor-mTOR complex. *Science (New York, N.Y)* 307, 1098-1101.

583 Saxton, R.A., Sabatini, D.M., 2017. mTOR Signaling in Growth, Metabolism, and Disease. *Cell*  
584 168, 960-976.

585 Shao, R.X., Zhang, L., Peng, L.F., Sun, E., Chung, W.J., Jang, J.Y., Tsai, W.L., Hyppolite, G.,  
586 Chung, R.T., 2010. Suppressor of cytokine signaling 3 suppresses hepatitis C virus replication  
587 in an mTOR-dependent manner. *Journal of virology* 84, 6060-6069.

588 Shimakami, T., Yamane, D., Jangra, R.K., Kempf, B.J., Spaniel, C., Barton, D.J., Lemon, S.M.,  
589 2012. Stabilization of hepatitis C virus RNA by an Ago2-miR-122 complex. *Proceedings of the*  
590 *National Academy of Sciences of the United States of America* 109, 941-946.

591 Shrivastava, S., Bhanja Chowdhury, J., Steele, R., Ray, R., Ray, R.B., 2012. Hepatitis C virus  
592 upregulates Beclin1 for induction of autophagy and activates mTOR signaling. *Journal of*  
593 *virology* 86, 8705-8712.

594 Stohr, S., Costa, R., Sandmann, L., Westhaus, S., Pfaender, S., Anggakusuma, Dazert, E.,  
595 Meuleman, P., Vondran, F.W., Manns, M.P., Steinmann, E., von Hahn, T., Ciesek, S., 2016.  
596 Host cell mTORC1 is required for HCV RNA replication. *Gut* 65, 2017-2028.

597 Sumpter, R., Jr., Loo, Y.M., Foy, E., Li, K., Yoneyama, M., Fujita, T., Lemon, S.M., Gale, M., Jr.,  
598 2005. Regulating intracellular antiviral defense and permissiveness to hepatitis C virus RNA  
599 replication through a cellular RNA helicase, RIG-I. *Journal of virology* 79, 2689-2699.

600 Takeda, H., Ueda, Y., Inuzuka, T., Yamashita, Y., Osaki, Y., Nasu, A., Umeda, M., Takemura,  
601 R., Seno, H., Sekine, A., Marusawa, H., 2017. Evolution of multi-drug resistant HCV clones from  
602 pre-existing resistant-associated variants during direct-acting antiviral therapy determined by  
603 third-generation sequencing. *Scientific reports* 7, 45605.

604 Tanida, I., Fukasawa, M., Ueno, T., Kominami, E., Wakita, T., Hanada, K., 2009. Knockdown of  
605 autophagy-related gene decreases the production of infectious hepatitis C virus particles.  
606 *Autophagy* 5, 937-945.

607 Thoreen, C.C., Kang, S.A., Chang, J.W., Liu, Q., Zhang, J., Gao, Y., Reichling, L.J., Sim, T.,  
608 Sabatini, D.M., Gray, N.S., 2009. An ATP-competitive mammalian target of rapamycin inhibitor  
609 reveals rapamycin-resistant functions of mTORC1. *The Journal of biological chemistry* 284,  
610 8023-8032.

611 Tsukiyama-Kohara, K., Iizuka, N., Kohara, M., Nomoto, A., 1992. Internal ribosome entry site  
612 within hepatitis C virus RNA. *Journal of virology* 66, 1476-1483.

613 Wang, C., Sarnow, P., Siddiqui, A., 1994. A conserved helical element is essential for internal  
614 initiation of translation of hepatitis C virus RNA. *Journal of virology* 68, 7301-7307.

615 Wendel, H.G., Silva, R.L., Malina, A., Mills, J.R., Zhu, H., Ueda, T., Watanabe-Fukunaga, R.,  
616 Fukunaga, R., Teruya-Feldstein, J., Pelletier, J., Lowe, S.W., 2007. Dissecting eIF4E action in  
617 tumorigenesis. *Genes & development* 21, 3232-3237.

618 Wullschleger, S., Loewith, R., Hall, M.N., 2006. TOR signaling in growth and metabolism. *Cell*  
619 124, 471-484.

620 Zhao, J., Zhai, B., Gygi, S.P., Goldberg, A.L., 2015. mTOR inhibition activates overall protein  
621 degradation by the ubiquitin proteasome system as well as by autophagy. *Proceedings of the*  
622 *National Academy of Sciences of the United States of America* 112, 15790-15797.

623

624

625

626

627

628



629 **FIGURES**

630

631

632

633 **Fig. 1.**

634

635

636

637

638

639

640

641

642

643

644

645

646

647

648

649

650

651

652

653

654

655

656

657

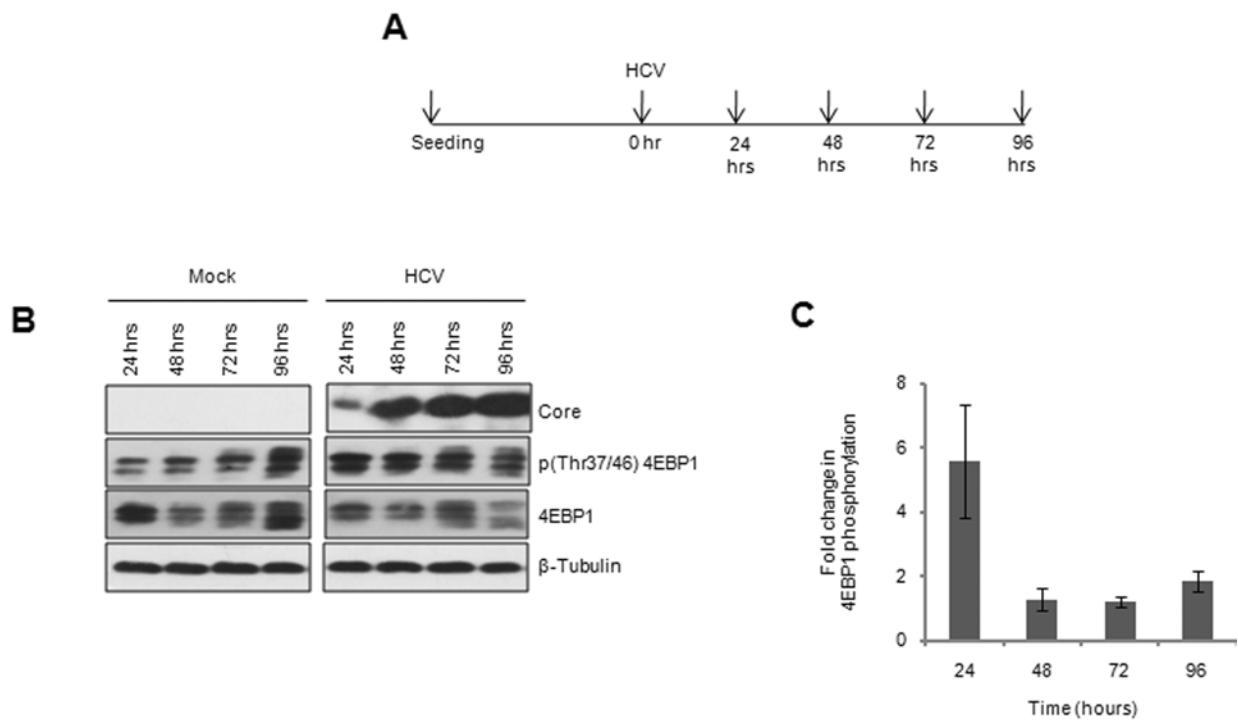

658 **Fig. 2.**

659  
660  
661  
662  
663  
664  
665  
666  
667  
668  
669  
670  
671  
672  
673  
674  
675  
676  
677  
678  
679  
680  
681  
682  
683  
684  
685  
686

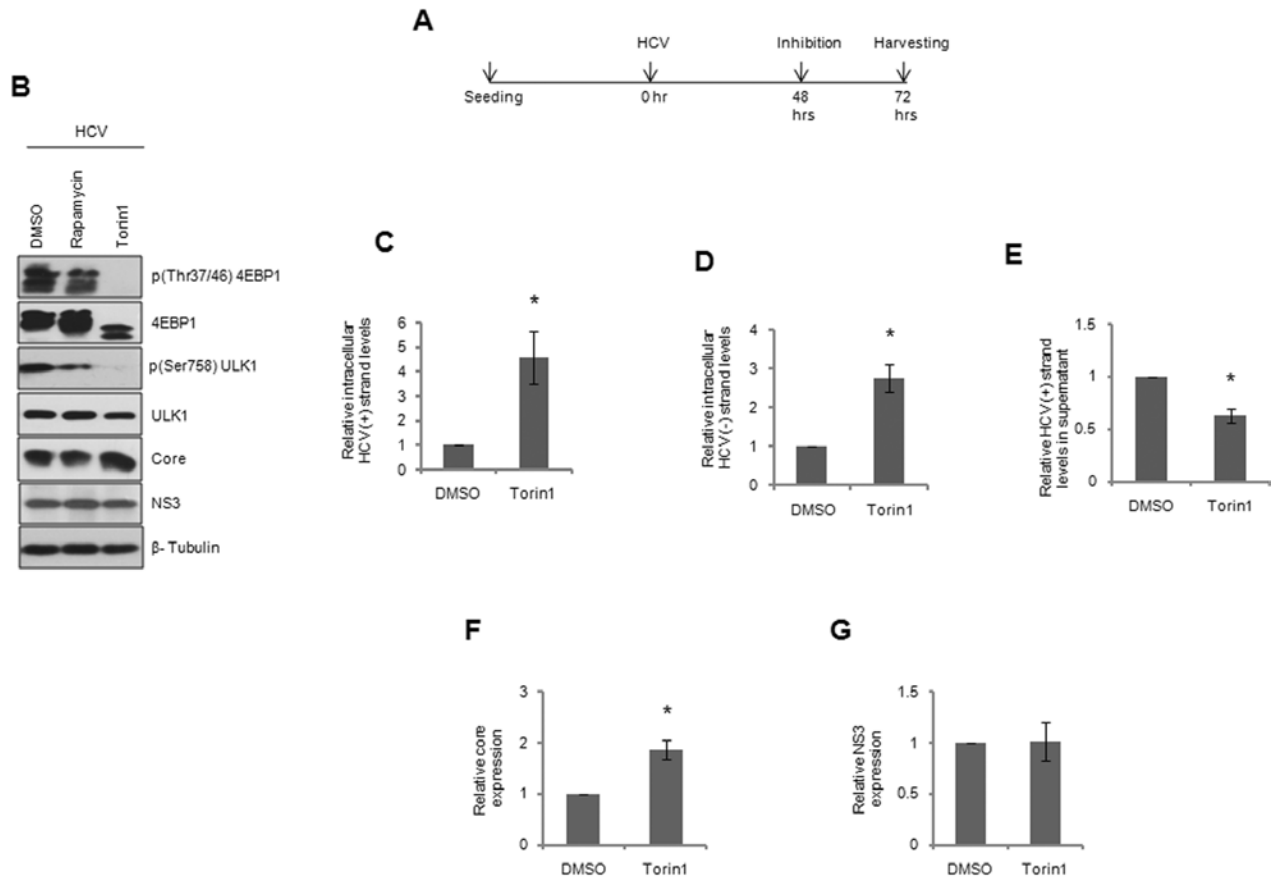

687 **Fig. 3.**

688  
689  
690  
691  
692  
693  
694  
695  
696  
697  
698  
699  
700  
701  
702  
703  
704  
705  
706  
707  
708  
709  
710  
711  
712  
713  
714  
715

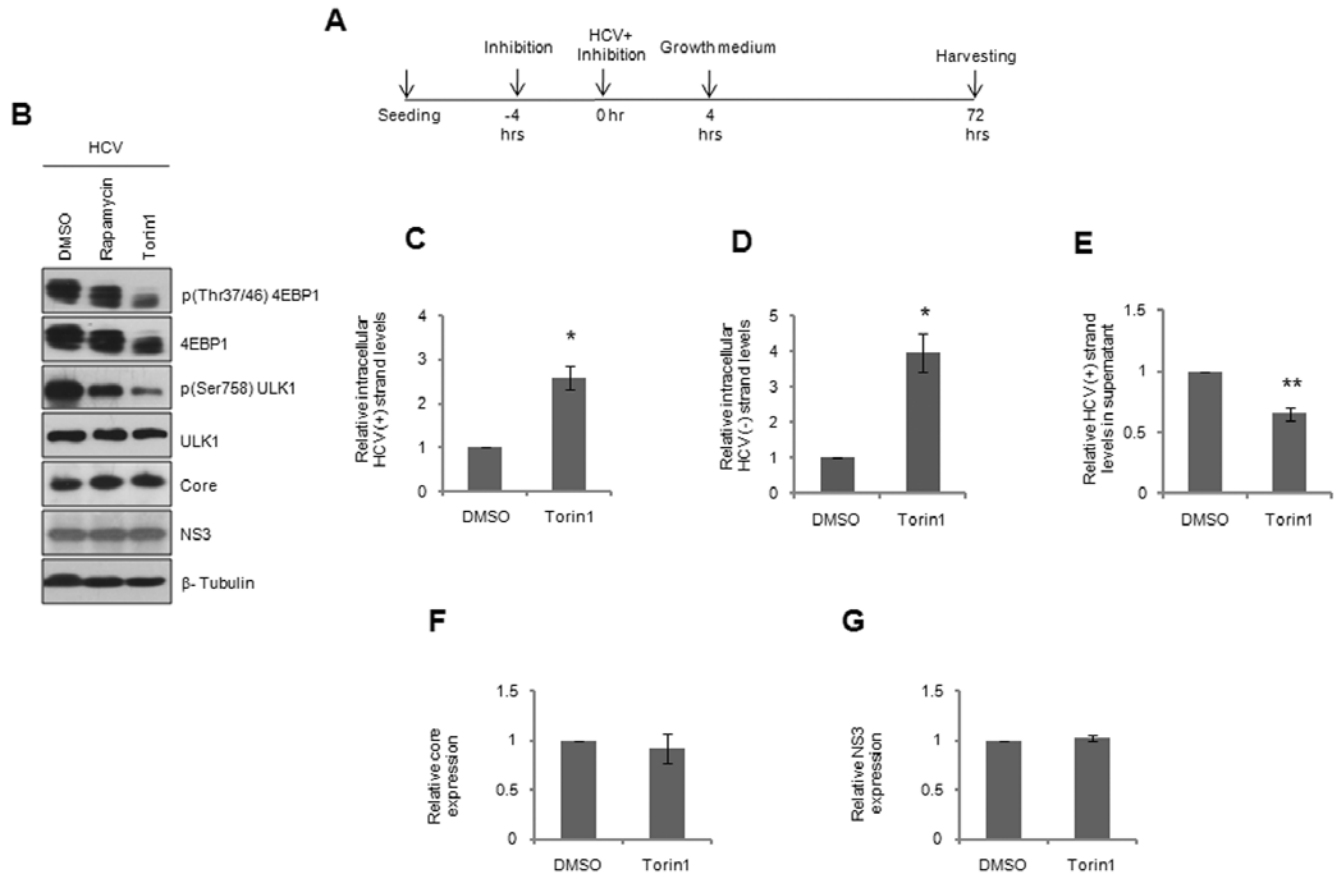

716 **Fig. 4.**

717

718

719

720

721

722

723

724

725

726

727

728

729

730

731

732

733

734

735

736

737

738

739

740

741

742

743

744

745

746

747

748

749

750

751

752

753

754

755

756

757

758

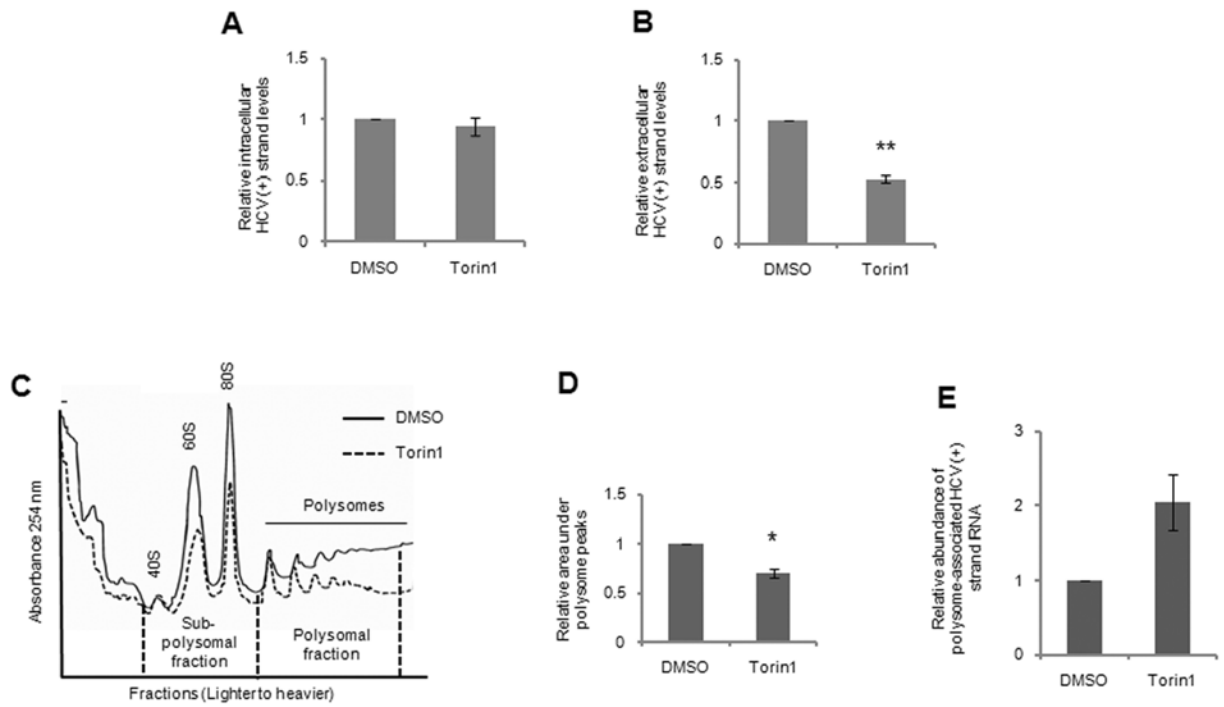

759 **Fig. 5.**

760  
761  
762  
763  
764  
765  
766  
767  
768  
769  
770  
771  
772  
773  
774  
775  
776  
777  
778  
779  
780  
781  
782  
783  
784  
785  
786  
787  
788  
789  
790  
791  
792  
793  
794  
795  
796  
797  
798  
799  
800  
801  
802  
803  
804

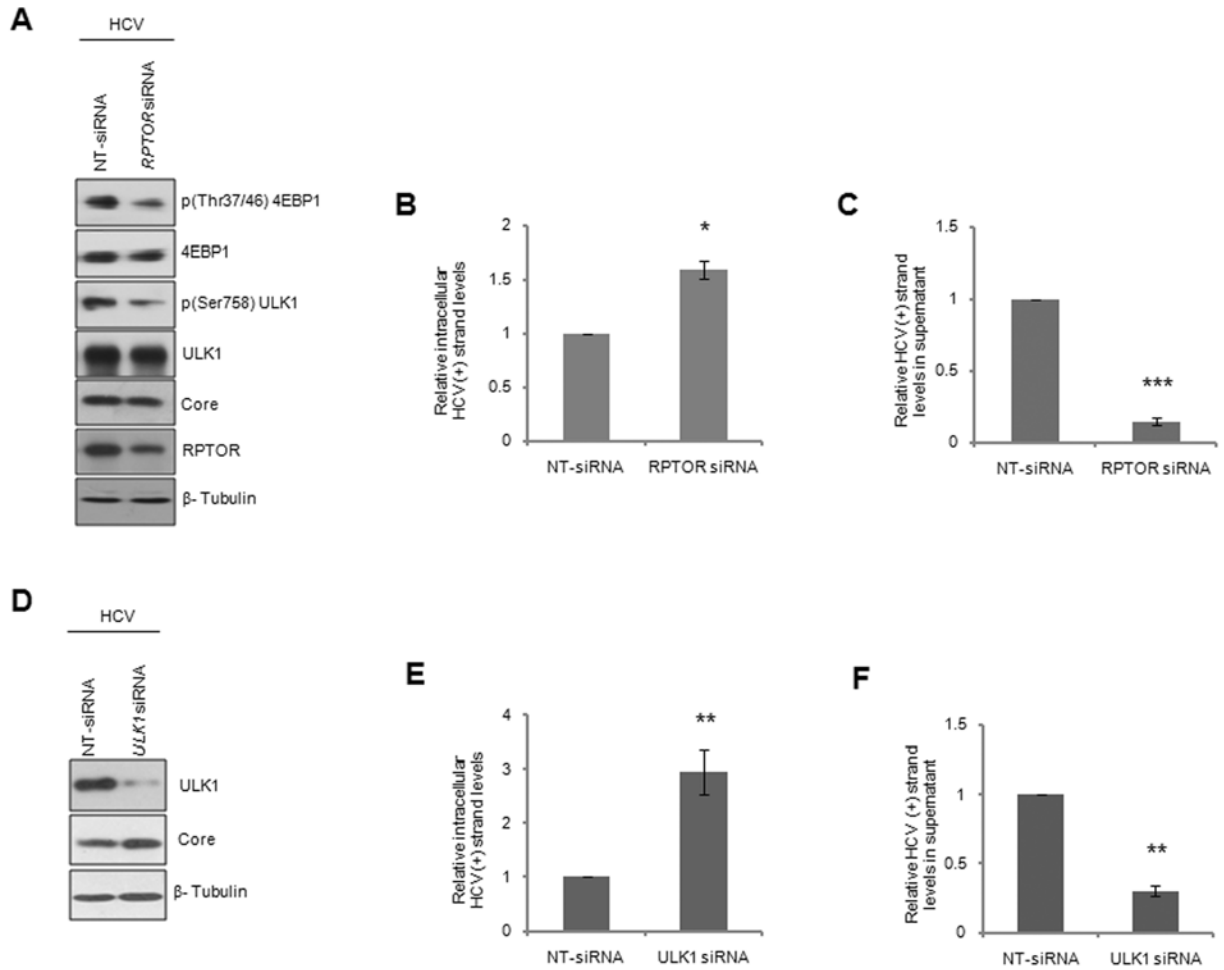

805 **Fig. 6.**

806

807

808

809

810

811

812

813

814

815

816

817

818

819

820

821

822

823

824

825

826

827

828

829

830

831

832

833

834

835

836

837

838

839

840

841

842

843

844

845

846

847

848

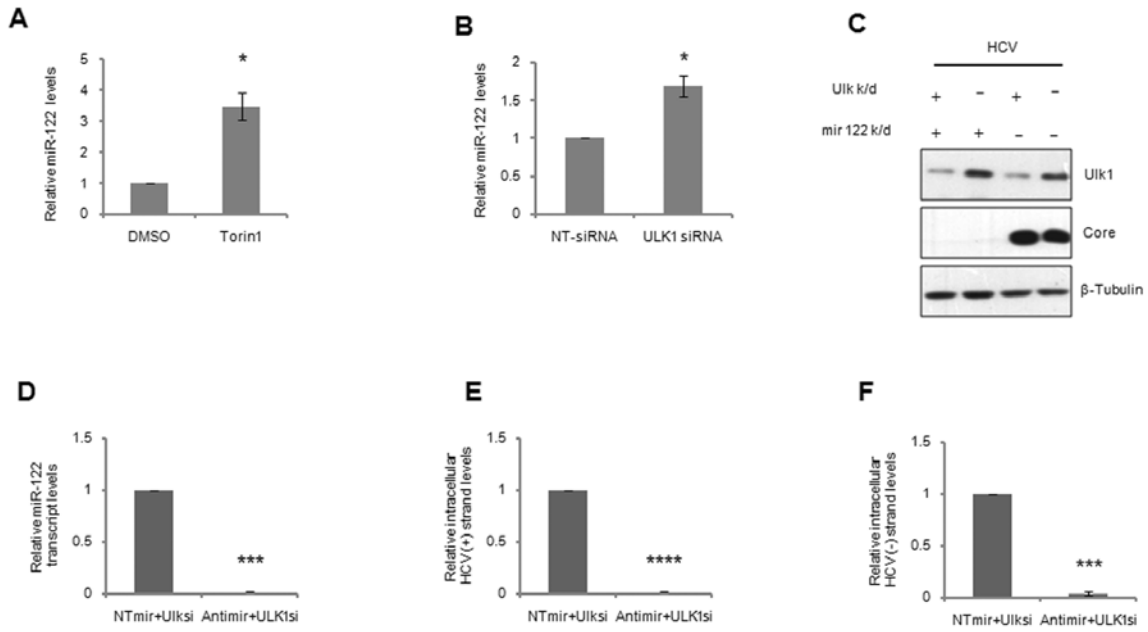

849 **Fig. 7.**

850

851

852

853

854

855

856

857

858

859

860

861

862

863

864

865

866

867

868

869

870

871

872

873

874

875

876

877

878

879

880

881

882

883

884

885

886

887

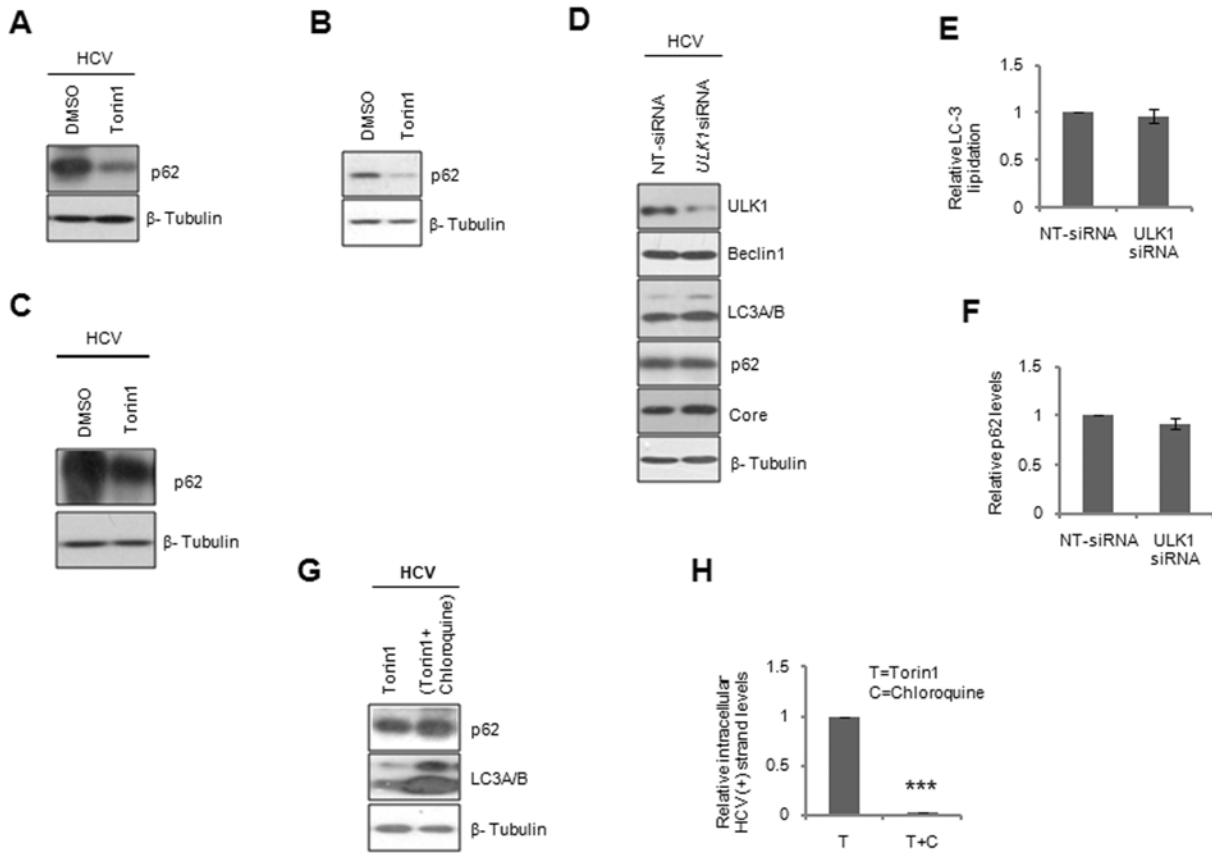

882 **LEGENDS**

884 **Fig. 1. Kinetics of HCV replication and its effect on mTOR activation.** (A)

885 Schematic of HCV infection setup. Huh7.5 cells were infected with HCV at 0.5 MOI for 4

886 hrs after which the infected cells were grown and harvested at every 24 hrs interval. (B)

887 Activation of mTOR during HCV infection in Huh7.5 cells demonstrated by

888 immunoblotting of the infected and mock lysates. (C) Quantification of 4EBP1  
889 phosphorylation in HCV infected cells. Densitometric values of phosphorylated 4EBP1  
890 bands from HCV infected samples were normalized to that of the total protein and was  
891 further normalized to that of  $\beta$ -Tubulin. These values were normalized to that of the  
892 mock-infected samples and fold changes were plotted in graph.

893 **Fig. 2. Effect of mTOR inhibition on HCV infection.** (A) Schematic depiction of  
894 HCV infection and mTOR inhibition. HCV infected cells were inhibited with either  
895 Rapamycin or Torin1 at 48 hpi for 24 hrs, after which the cells were harvested. (B)  
896 Immunoblot confirming mTOR inhibition by the two inhibitors. Relative intracellular  
897 abundance of (C) (+) and (D) (-) strands of HCV, quantified by qRT-PCR. (E)  
898 Extracellular HCV RNA abundance in supernatants of inhibited cells. (F) Relative levels  
899 of core and (G) NS3 upon mTOR inhibition from immunoblots.

900 **Fig. 3. Consequence of pre-inhibition of mTOR on HCV infection.** (A) Schematic of  
901 mTOR inhibition and HCV infection. Huh7.5 cells were pre-treated with either  
902 Rapamycin or Torin1 for 4 hrs prior to HCV infection. At the end of this, cells were  
903 infected with HCV in presence of the inhibitors. Subsequently, cells were cultured in  
904 fresh media for another 68 hrs at which time they were harvested. (B) Immunoblot  
905 validating the inhibition of mTOR. (C) Relative intracellular abundance of HCV (+) and  
906 (D) (-) strands, quantified by qRT-PCR. (E) Extracellular HCV RNA levels quantified in  
907 supernatants. (F) Relative levels of core and (G) NS3 upon mTOR inhibition from  
908 immunoblots.

909 **Fig. 4. HCV post-replication steps are perturbed with Torin1, but not viral protein**  
910 **translation** (A) Equal number of HCV infected Huh7.5 cells (primary infection) in the



911 presence of Torin1 or DMSO from Figure 3A were freeze-thawed and the released viral  
912 particles were resuspended in equal volumes of serum-free media. This viral  
913 suspension was used to infect fresh Huh7.5 cells for 72 hrs (secondary infection) after  
914 which intracellular HCV RNA abundance was quantified. Relative HCV (+) strand  
915 abundance from Huh7.5 cells infected in the second round, infected with intracellular  
916 virus of either Torin1 or DMSO treated cells during the primary infection. (B) Relative  
917 HCV (+) strand abundance from Huh7.5 cells infected with the supernatant of Torin1 or  
918 DMSO treated cells during the primary infection as shown in Figure 3E. (C) Polysome  
919 profiles of HCV infected cells after pre-treatment with Torin1. Cells harvested at 72 hpi  
920 in pre-treatment mode were lysed and polysome profiles were generated. (D)  
921 Quantitative representation of relative polysome association in Torin1 and DMSO  
922 treated cells as described in (C). Area under the polysomal fractions were measured for  
923 representation. (E) All the polysome fractions were pooled, RNA was precipitated and  
924 relative association of HCV RNA with polysome fractions of Torin1 pre-treated cells  
925 against DMSO treated control cells.

926 **Fig. 5. mTORC1 restricts intracellular HCV RNA abundance and facilitates**  
927 **extracellular HCV RNA levels through ULK1** (A) Confirmation of Raptor depletion by  
928 immunoblotting. Huh7.5 cells were transfected with siRNA pool targeting *RPTOR* or with  
929 non-targeting siRNA 18 hrs before infection. 72 hpi, cells were harvested for analysis.  
930 (B) Relative intracellular abundance of HCV (+) strands quantified by qRT-PCR. (C)  
931 HCV abundance quantified in supernatants. (D) Immunoblotting for confirmation of ULK1  
932 depletion. Huh7.5 cells were transfected with siRNA pool targeting *ULK1* or with non-  
933 targeting siRNA 18 hrs before infection. 72 hpi, cells were harvested for analysis. (E)

934 Relative intracellular abundance of HCV (+) strands quantified by qRT-PCR. (F) HCV  
935 RNA levels quantified in supernatants.

936 **Fig. 6. mTOR restricts miR122 transcription through ULK1** Relative miR-122 levels  
937 in HCV infected cells subjected to (A) Torin1 pre-treatment and (B) ULK1 depletion. The  
938 miR-122 levels were quantified by Taqman based kits and normalized against *RNU6B*.  
939 (C) Effect of anti-miR-122 on ULK1 mediated activation of miR-122 in HCV infection.  
940 Confirmation of ULK1 knockdown and HCV infection by immunoblotting. Huh7.5 cells  
941 were transfected with siRNA pool targeting *ULK1* or with non-targeting siRNA 18 hrs  
942 before infection. 72 hpi, cells were harvested for analysis. 24 hours prior harvesting  
943 200uM anti-miR122 was transfected. The miR-122 levels were quantified by Taqman  
944 based kits and normalized against *RNU6B*. (D) Quantitation of miR-122 levels after  
945 transfecting anti-miR-122 or the control anti-miR. (E) Relative intracellular abundance of  
946 HCV (+) strands and (F) (-) strands in the presence of anti-miR-122.

947 **Fig. 7. ULK1 does not regulate autophagy in Huh7.5 cells upon HCV infection.** (A)  
948 Analysis of p62 levels following Torin1 treatment of HCV infected Huh7.5 cells in pre-  
949 treatment mode by immunoblotting. (B) Evaluation of autophagy activation in Huh7.5  
950 cells treated with Torin1 for 8hrs. Cells treated with Torin1 for 8 hrs were harvested to  
951 analyze autophagy markers by immunoblotting. (C) HCV infected cells were inhibited  
952 with Torin1 as shown in Figure 2. Immunoblot of p62 after 24 hours of Torin1 post-  
953 inhibition. (D) Investigation of autophagy in ULK1 depleted Huh7.5 cells upon HCV  
954 infection as described in the Figure 5A, by immunoblotting. (E) Graphical representation  
955 of relative LC3A/B lipidation and (F) that of p62 levels in samples displayed in Figure  
956 7D. (G) Analysis of autophagy in Huh7.5 cells pretreated with Torin1 in presence or

957 absence of Chloroquine, by immunoblotting. Huh7.5 cells were pre-treated with 750nM  
958 Torin1 with or without 25 $\mu$ M Chloroquine for 6 hrs after which they were both infected  
959 with HCV for 4 hrs in the presence of the inhibitors. Post-infection, cells were allowed to  
960 grow in fresh media for another 68 hours before harvesting. (H) Graphical  
961 representation of relative HCV intracellular (+) strand titers quantified by qRT-PCR. T  
962 =Torin1, C=Chloroquine.

963 **Graphical Abstract:** HCV infection activates mTORC1. Activated mTORC1  
964 phosphorylates ULK1 that, possibly in association with other factors, suppresses  
965 transcription of miR-122. Lower miR-122 levels would in turn affect intracellular HCV  
966 RNA abundance. mTORC1 and ULK1 increase abundance of extracellular HCV RNA  
967 through unknown mechanisms. Though ULK1 is the prime molecule of autophagy  
968 regulation, it does not govern autophagy in Huh7.5 cells.

969
